# Supplementary material for: Estimating hydrogen/air flame acceleration induced by 3D flame instabilities from 2D simulations
Source: Research Square preprint supplement (doi:10.21203/rs.3.rs-7990745/v1), 2026-01-13
Supplement: Supplementary file 1 [file e031448bb3bdf9b47a1d8ea2.pdf]

# Supplementary Material:

## Estimating Hydrogen/Air Flame Acceleration Induced by 3D Flame Instabilities from 2D Simulations

Cédric C. Mehl

### Supplementary Figures

Additional figures for the unstable flame cases not shown in the main article are provided in this supplementary material. This includes instantaneous visualization of the 2D and 3D flames, and the temporal evolution of the flame wrinkling factor and the stretch factor. Readers are referred to Table 1 of the paper for the naming of the cases.

#### Instantaneous visualization of 2D and 3D unstable flames

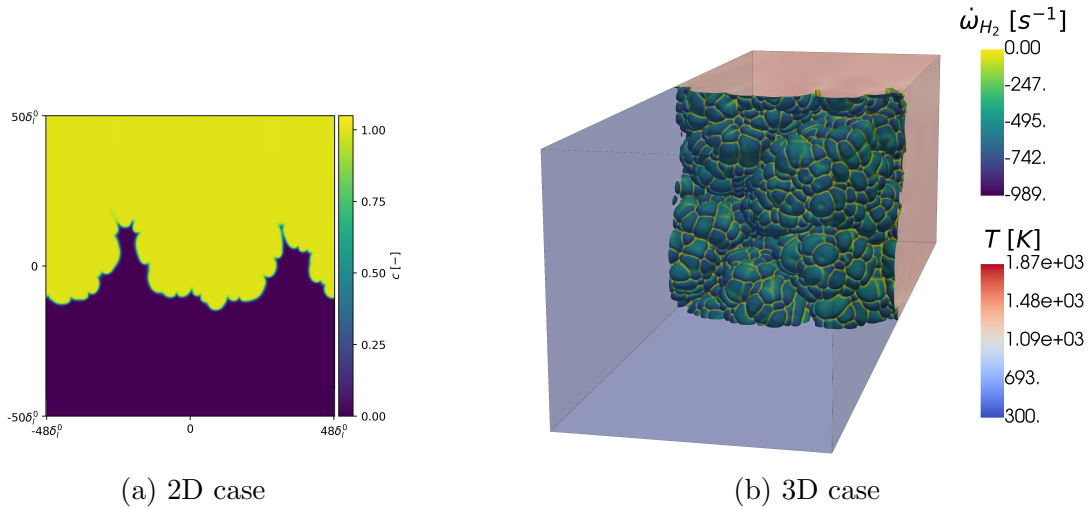

Figure 1: Visualization of instantaneous solutions for the 2D and 3D unstable flames in conditions phi05\_p5\_T300\_B. Left: field of progress variable  $c$  for the 2D case. Right: progress variable isosurface ( $c = 0.8$ ) colored by the fuel reaction rate  $\dot{\omega}_{H_2}$ .

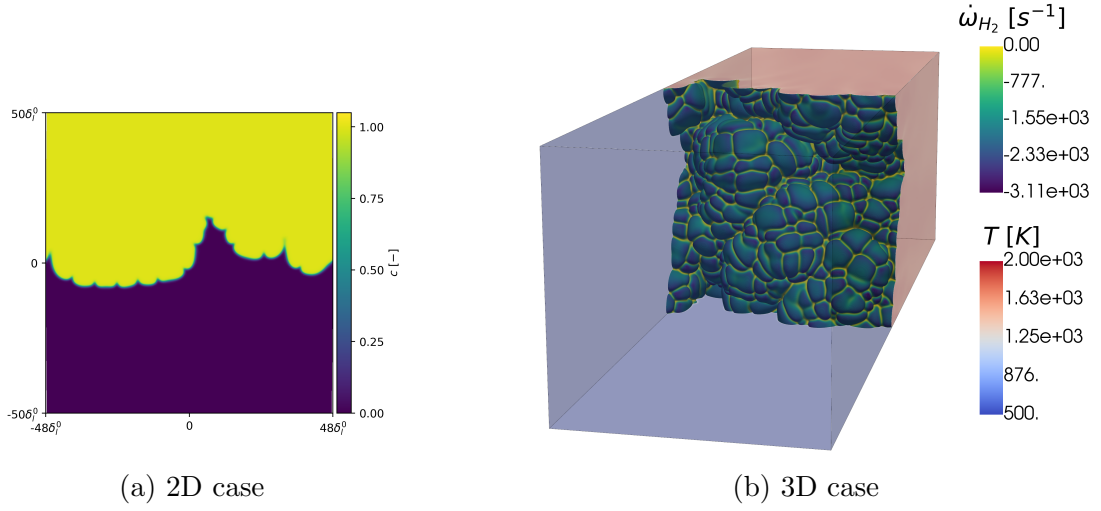

Figure 2: Visualization of instantaneous solutions for the 2D and 3D unstable flames in conditions phi05\_p10\_T500\_B. Left: field of progress variable  $c$  for the 2D case. Right: progress variable isosurface ( $c = 0.8$ ) colored by the fuel reaction rate  $\dot{\omega}_{H_2}$ .

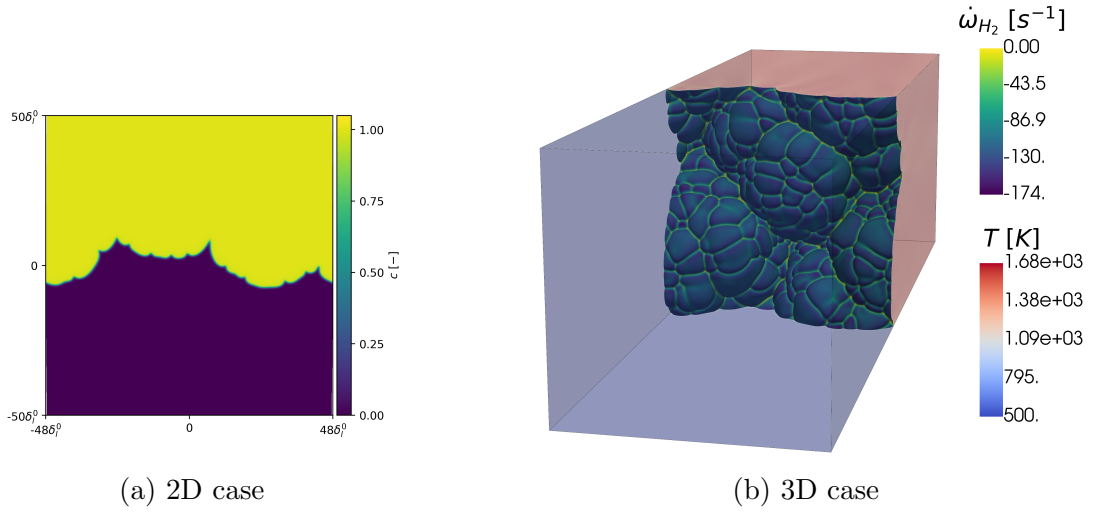

Figure 3: Visualization of instantaneous solutions for the 2D and 3D unstable flames in conditions phi04\_p1\_T500\_B. Left: field of progress variable  $c$  for the 2D case. Right: progress variable isosurface ( $c = 0.8$ ) colored by the fuel reaction rate  $\dot{\omega}_{H_2}$ .

## Evolution of $\Xi$ and $I_0$ in time

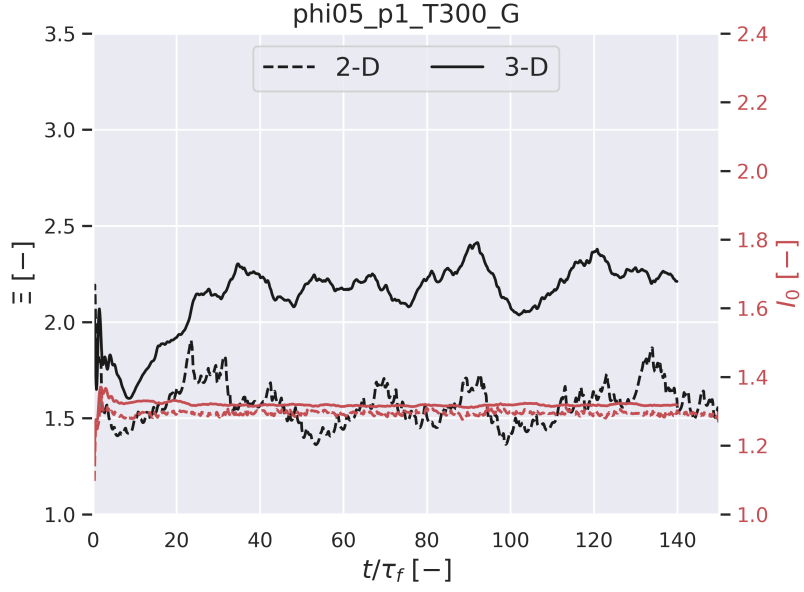

Figure 4: Temporal evolution for case phi05\_p1\_T300\_G of flame wrinkling  $\Xi$  (black) and stretch factor  $I_0$  (red) for 2D (dashed lines) and 3D (plain lines).

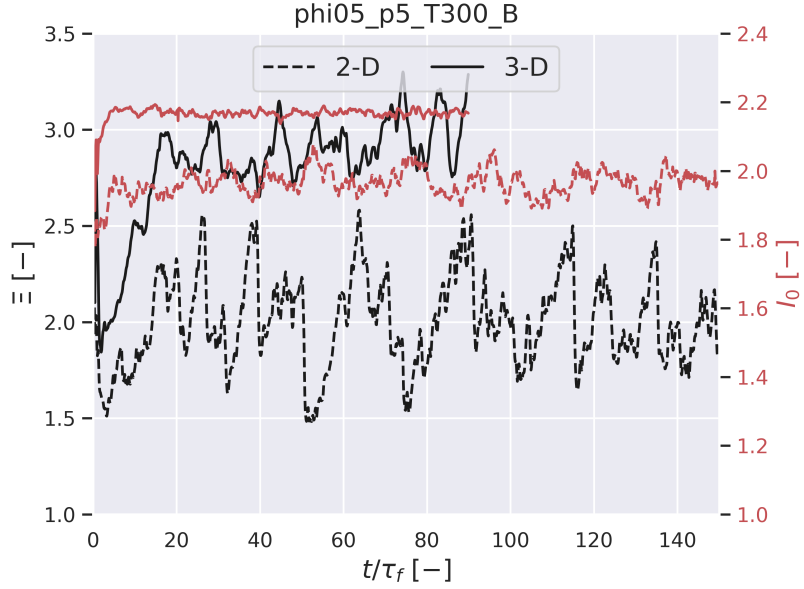

Figure 5: Temporal evolution for case phi05\_p5\_T300\_B of flame wrinkling  $\Xi$  (black) and stretch factor  $I_0$  (red) for 2D (dashed lines) and 3D (plain lines).

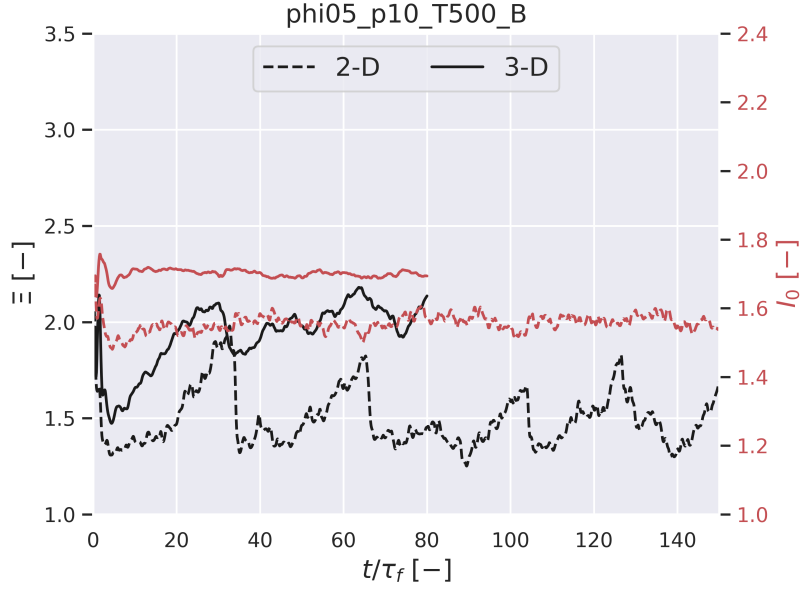

Figure 6: Temporal evolution for case phi05\_p10\_T500\_B of flame wrinkling  $\Xi$  (black) and stretch factor  $I_0$  (red) for 2D (dashed lines) and 3D (plain lines).

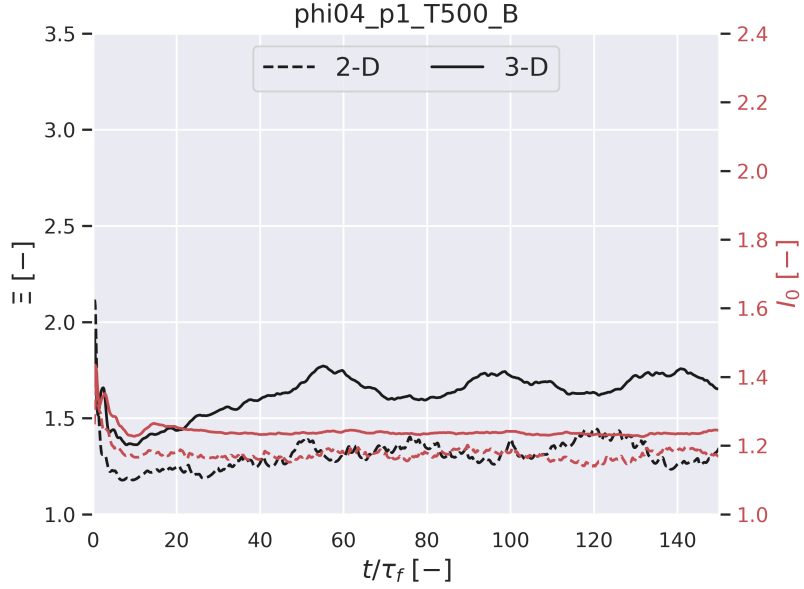

Figure 7: Temporal evolution for case phi04\_p1\_T500\_B of flame wrinkling  $\Xi$  (black) and stretch factor  $I_0$  (red) for 2D (dashed lines) and 3D (plain lines).
